# Supplementary material for: PEI@SiO2: synthesis from diatomite and application for capturing phenolic compounds from aqueous solution
Source: Royal Society of Chemistry journal article supplement (doi:10.1039/c4ra03190c), 2014-01-01
Supplement: c4ra03190c1.pdf [file c4ra03190c1.pdf]

## A table of contents entry

### **PEI@SiO<sub>2</sub>: synthesis from diatomite and application for capturing phenolic compounds from aqueous solution**

Zheng-Yong Chen,<sup>a</sup> Ya-Yuan He<sup>a</sup> and Hong-Wen Gao<sup>\*a</sup>

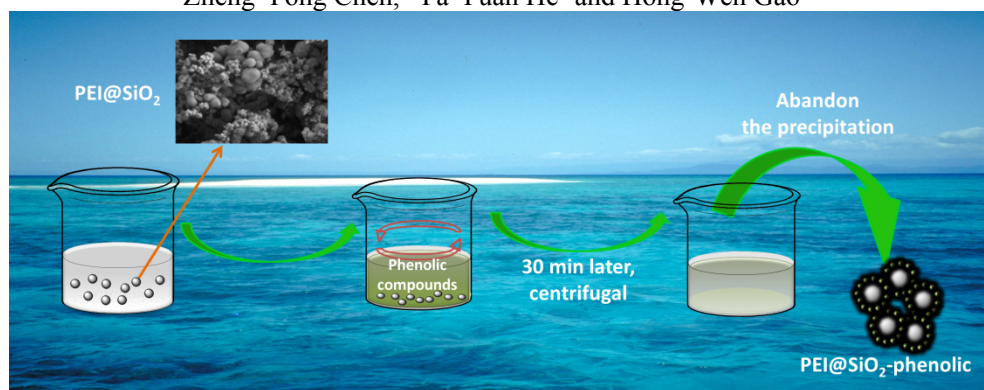

5

The PEI@SiO<sub>2</sub> hybrid composite was synthesized for sorption of phenolic compounds.

10

15

## Electronic Supplementary Information

### PEI@SiO<sub>2</sub>: synthesis from diatomite and application for capturing phenolic compounds from aqueous solution

Zheng-Yong Chen,<sup>a</sup> Ya-Yuan He<sup>a</sup> and Hong-Wen Gao<sup>\*a</sup>

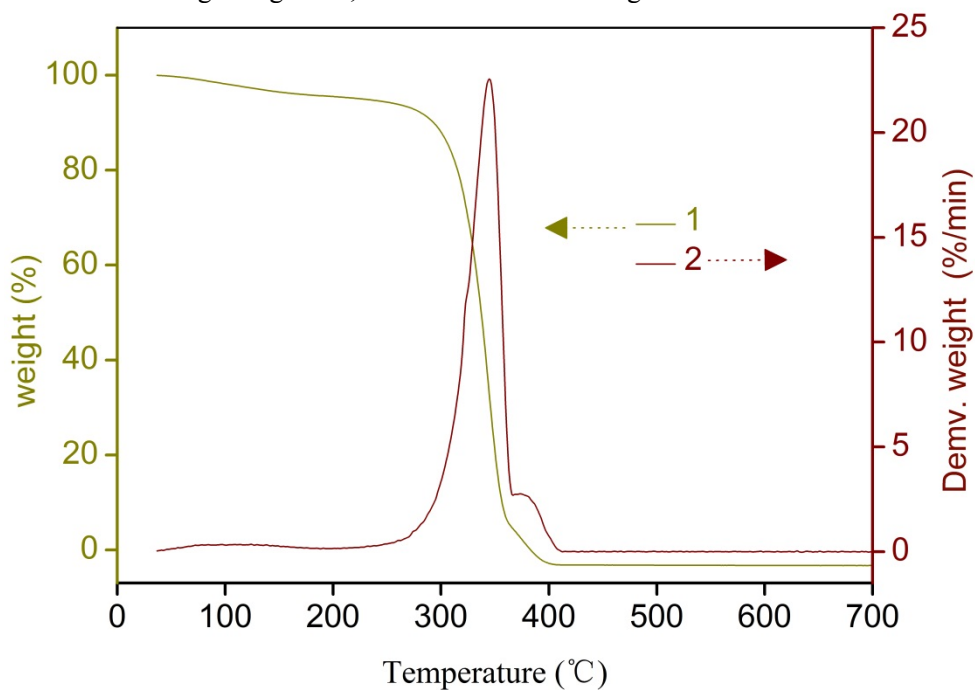

5

Fig. S1 DTA (1) and TGA of PEI (2)

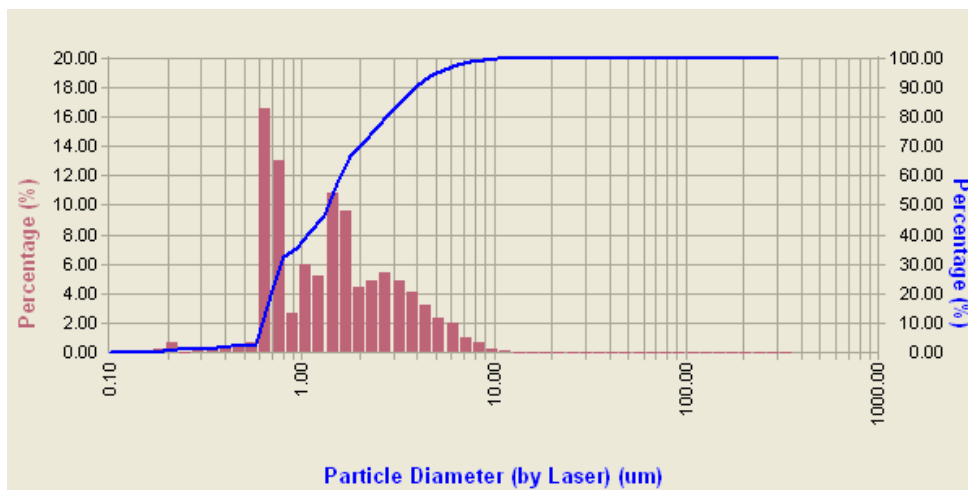

Fig. S2 Particle size distribution of the PEI@SiO<sub>2</sub>

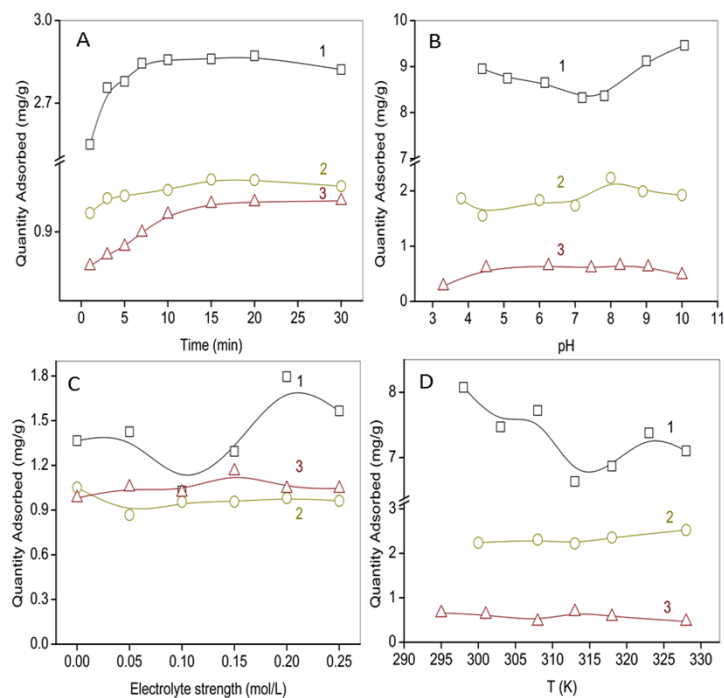

**Fig. S3** **A:** the sorption curve of phenolic compounds (1- phenol, *o*-chlorophenol and 3- BPA) to the the PEI@SiO<sub>2</sub> at different times. **B:** the sorption curve of phenolic compounds (1- phenol, 2- *o*-5 chlorophenol and 3- BPA) to the the PEI@SiO<sub>2</sub> at different pH. **C:** the sorption curve of phenolic compounds (1- phenol, 2- *o*-chlorophenol and 3- BPA) to the the PEI@SiO<sub>2</sub> at different ionic strength. **D:** the sorption curve of phenolic compounds (1- phenol, 2- *o*-chlorophenol and 3- BPA) to the the PEI@SiO<sub>2</sub> at different temperature.
